# Supplementary material
Source: publisher figshare collection journal article supplement (https://acs.figshare.com/ndownloader/files/4463587)
Supplement: Supplementary file 1 [file 4463587]

Supporting Figure S1

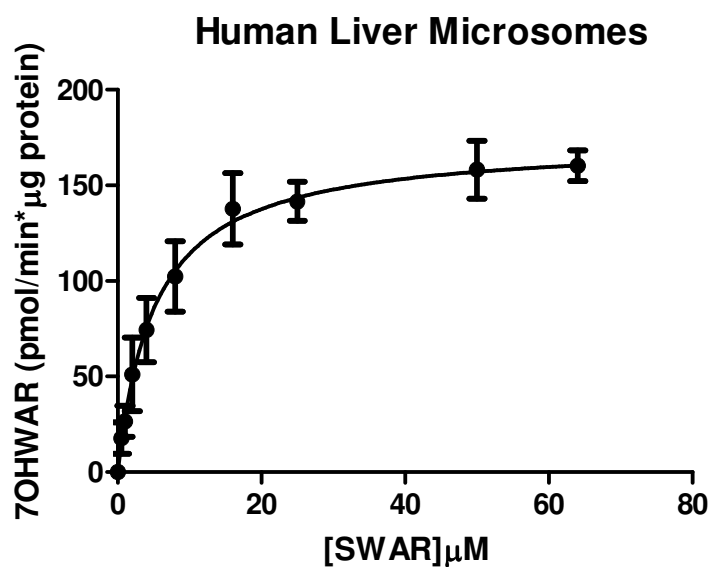

**Figure S1.** Steady-state kinetic profile of uninhibited Human liver microsomal metabolism of S-warfarin ( $\mu$ M). Reaction conditions are described in materials and methods.

Supporting Figure S2

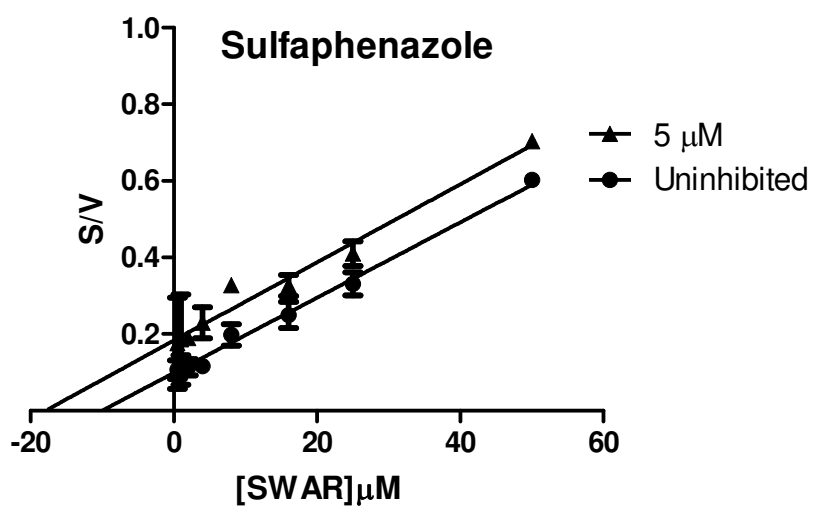

**Figure S2.** Hanes-Woolf plots of sulfaphenazole inhibition of Human liver microsomal metabolism of S-warfarin ( $\mu$ M). Reaction conditions are described in materials and methods.
